# Supplementary material
Source: PubMed Central journal article supplement (PMC7772691)

Supplemental figure S1.

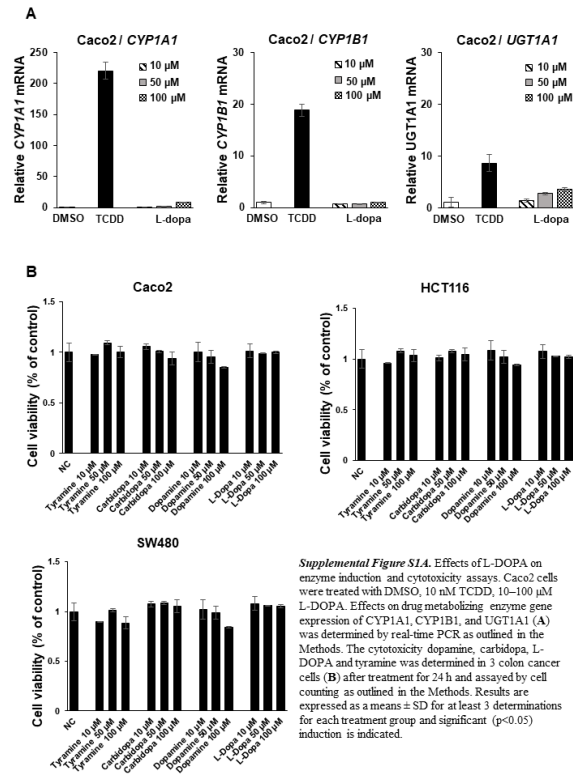

## Supplemental Figure 2

A.

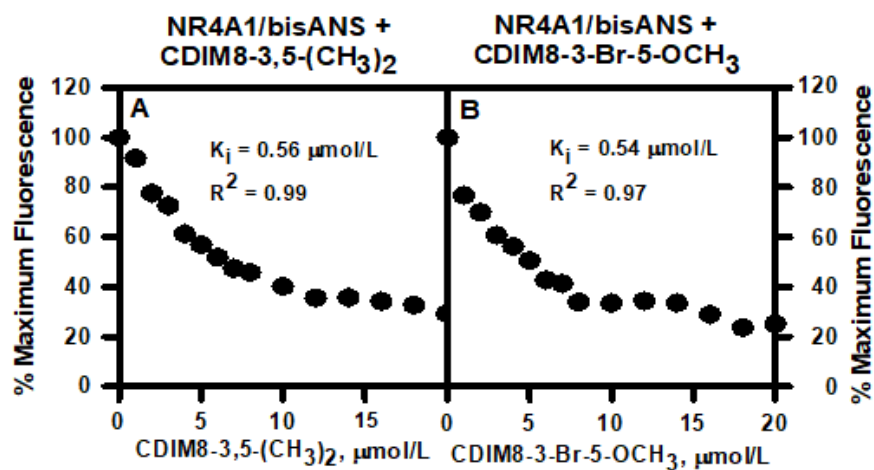

B.

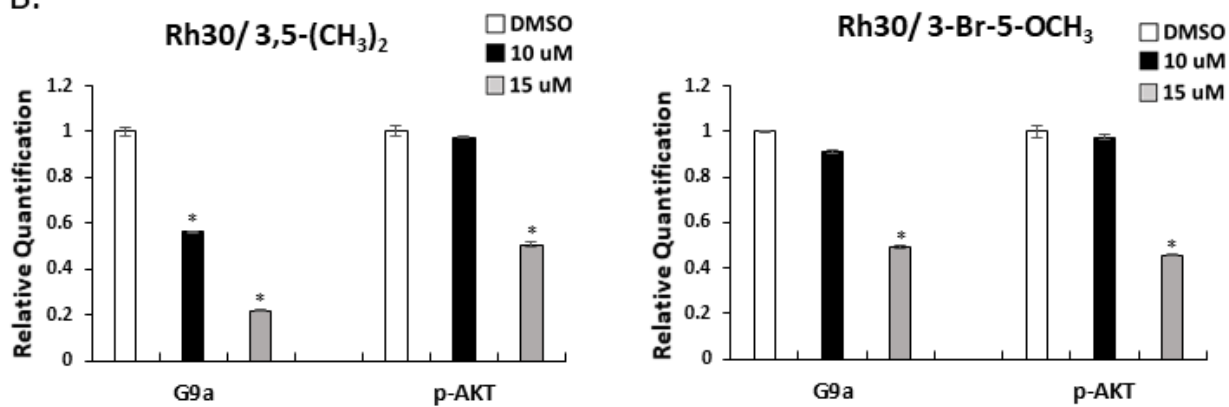

C.

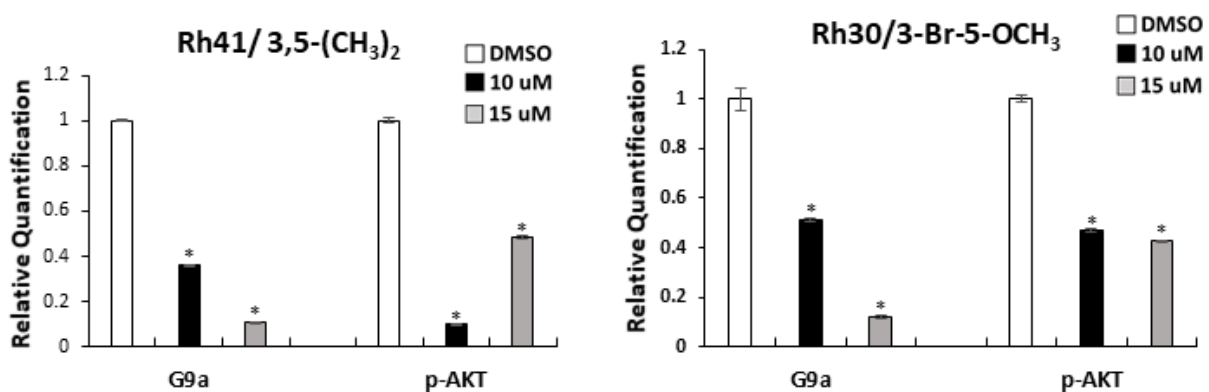

Supplement: NIHMS1650708-supplement-Supplementary_Material.pdf [file NIHMS1650708-supplement-Supplementary_Material.pdf]
